# Supplementary material
Source: PubMed Central journal article supplement (PMC4650573)
Supplement: cr20153x2.pdf [file cr20153x2.pdf]

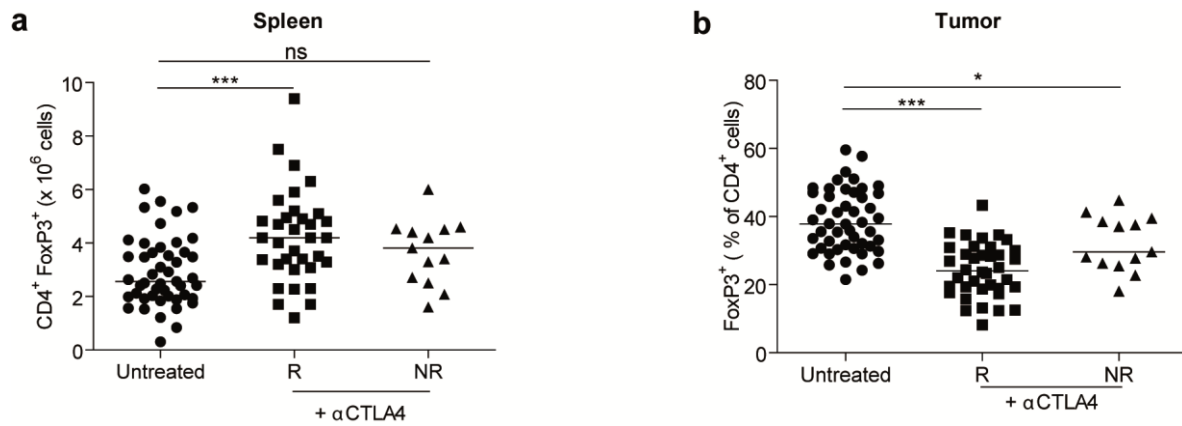

**Supplementary Information Figure S2. Monitoring of Foxp3 CD4<sup>+</sup> T cells during mCTLA4 blockade.**

Flow cytometric determination of intracellular Foxp3 expression in CD4<sup>+</sup> T cells in the spleen (left panel) and the tumor (right panel) in responder (R) and non-responder (NR) mice following mCTLA4 blockade. Each dot represents one tumor. Each experiment included 5-7 mice/group and data from 3 concatenated experiments are shown. Student's t test or Anova: \* p<0.05, \*\*\*p<0.001, ns: not significant.
