# Supplementary material
Source: PubMed Central journal article supplement (PMC4650573)
Supplement: cr20153x4.pdf [file cr20153x4.pdf]

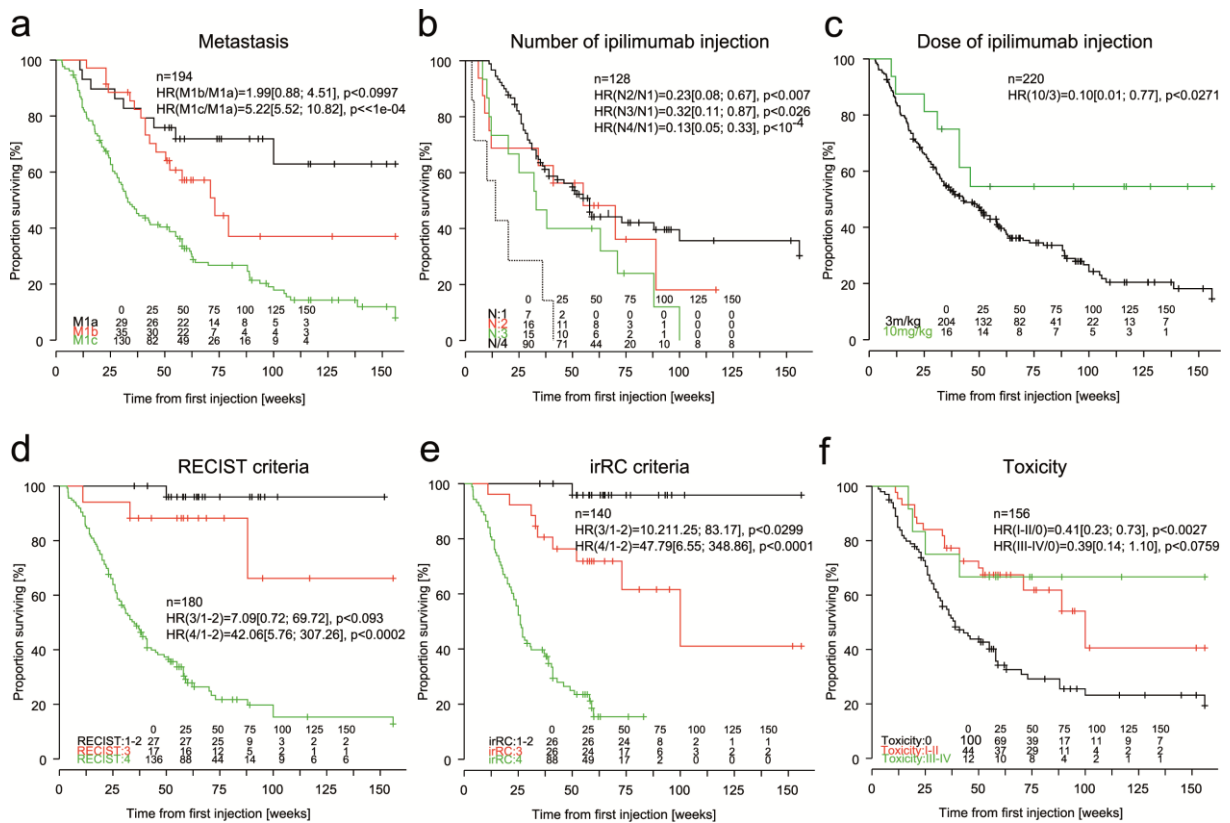

**Supplementary Information Figure S4. Univariate analyses of multiple parameters of clinical significance for OS of MM patients.**

According to the data presented in Table 1, each parameter (indicated above each graph) that was statistically associated with overall survival (except sCD25 and LDH featuring in Fig. 6) has been plotted overtime (Log Rank survival curves). Statistical methods and results are either shown or explained in the M&M section.
