# Supplementary material
Source: PubMed Central journal article supplement (PMC4650573)
Supplement: cr20153x5.pdf [file cr20153x5.pdf]

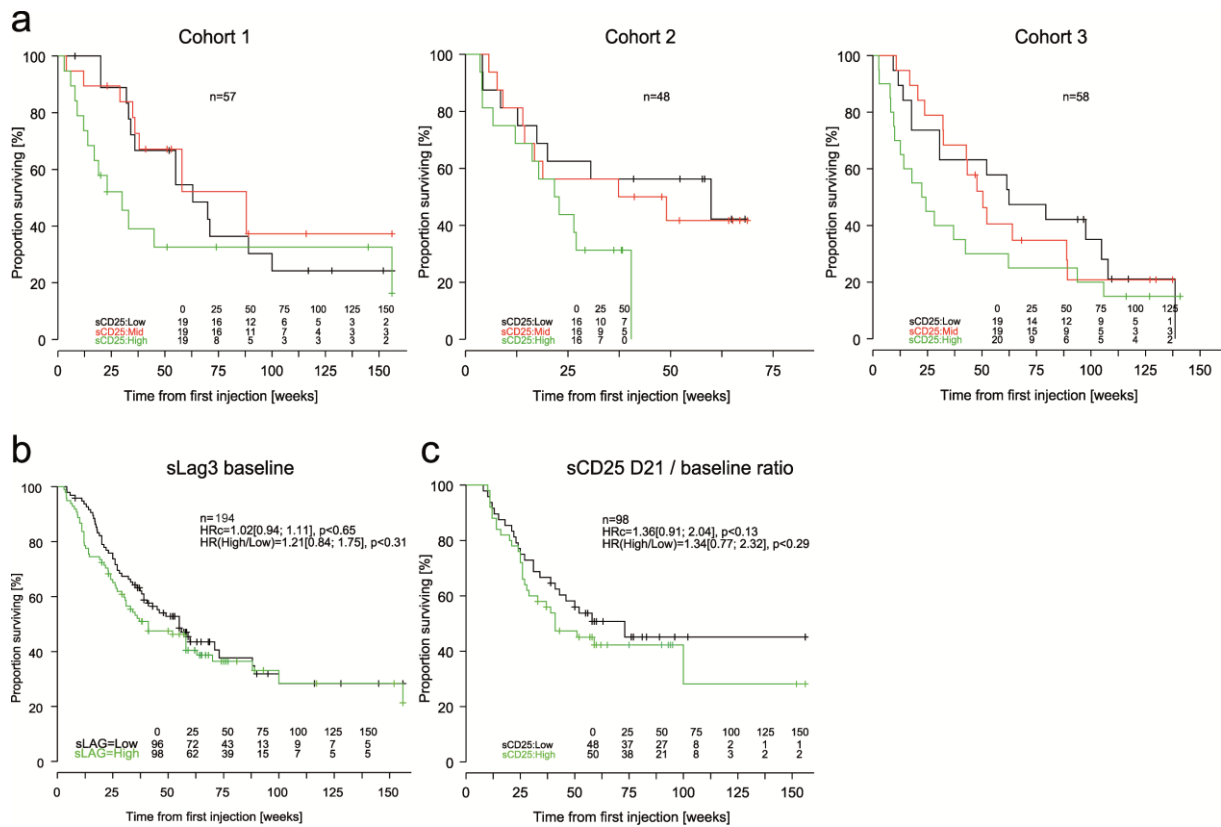

**Supplementary Information Figure S5. sCD25 serum levels at T0 versus T21 and OS in MM patients.**

*a. Baseline serum levels of sCD25 and OS shown in details.* Kaplan-Meier curves of 3 representative cohorts segregated into 3 groups according to the tertiles. *b. Baseline serum levels of sLAG3 and OS.* Kaplan-Meier curves of 194 MM patients segregated into two groups according to the median LRT=1.28, p=0.257. *c. Analysis of the ratio between post C1 sCD25 / baseline sCD25 and OS.* A subgroup of 98 patients in the 262 aforementioned patients for whom samples after 1 ipilimumab injection were available was analyzed for the correlation between sCD25 post C1/sCD25 baseline ratio and OS. LRT=1.04, p<0.007.
